# Supplementary material for: i-shaped antibody engineering enables conformational tuning of biotherapeutic receptor agonists
Source: Springer Nature journal article supplement (doi:10.1038/s41467-024-44985-x), 2024-01-20
Supplement: 41467_2024_44985_MOESM1_ESM.pdf [file 41467_2024_44985_MOESM1_ESM.pdf]

## Supplementary Information

### **i-shaped antibody (iAb) engineering enables conformational tuning of biotherapeutic receptor agonists**

Matthew G. Romei<sup>1^</sup>, Brandon Leonard<sup>1^</sup>, Zachary B. Katz<sup>2</sup>, Daniel Le<sup>3</sup>, Yanli Yang<sup>1</sup>, Eric S. Day<sup>4</sup>, Christopher W. Koo<sup>5</sup>, Preeti Sharma<sup>1</sup>, Jack Bevers III<sup>1</sup>, Ingrid Kim<sup>1</sup>, Huiguang Dai<sup>1</sup>, Farzam Farahi<sup>1</sup>, May Lin<sup>6</sup>, Andrey S. Shaw<sup>2</sup>, Gerald Nakamura<sup>1</sup>, Jonathan T. Sockolosky<sup>1\*</sup>, Greg A. Lazar<sup>1\*</sup>

<sup>1</sup>Department of Antibody Engineering, Genentech Inc., South San Francisco, CA, USA

<sup>2</sup>Department of Research Biology, Genentech Inc., South San Francisco, CA, USA

<sup>3</sup>Department of Microchemistry, Proteomic, Lipidomics, and Next Generation Sequencing, Genentech Inc., South San Francisco, CA, USA

<sup>4</sup>Department of Research Biology, Genentech Inc., South San Francisco, CA, USA

<sup>5</sup>Department of Structural Biology, Genentech Inc., South San Francisco, CA, USA

<sup>6</sup>Department of Pharma Technical Development, Genentech Inc., South San Francisco, CA, USA

<sup>^</sup>These authors contributed equally to this work

<sup>\*</sup>Correspondence: Greg A. Lazar, [gregorylazar@gmail.com](mailto:gregorylazar@gmail.com); Jonathan T. Sockolosky, [jsockolo@gmail.com](mailto:jsockolo@gmail.com)



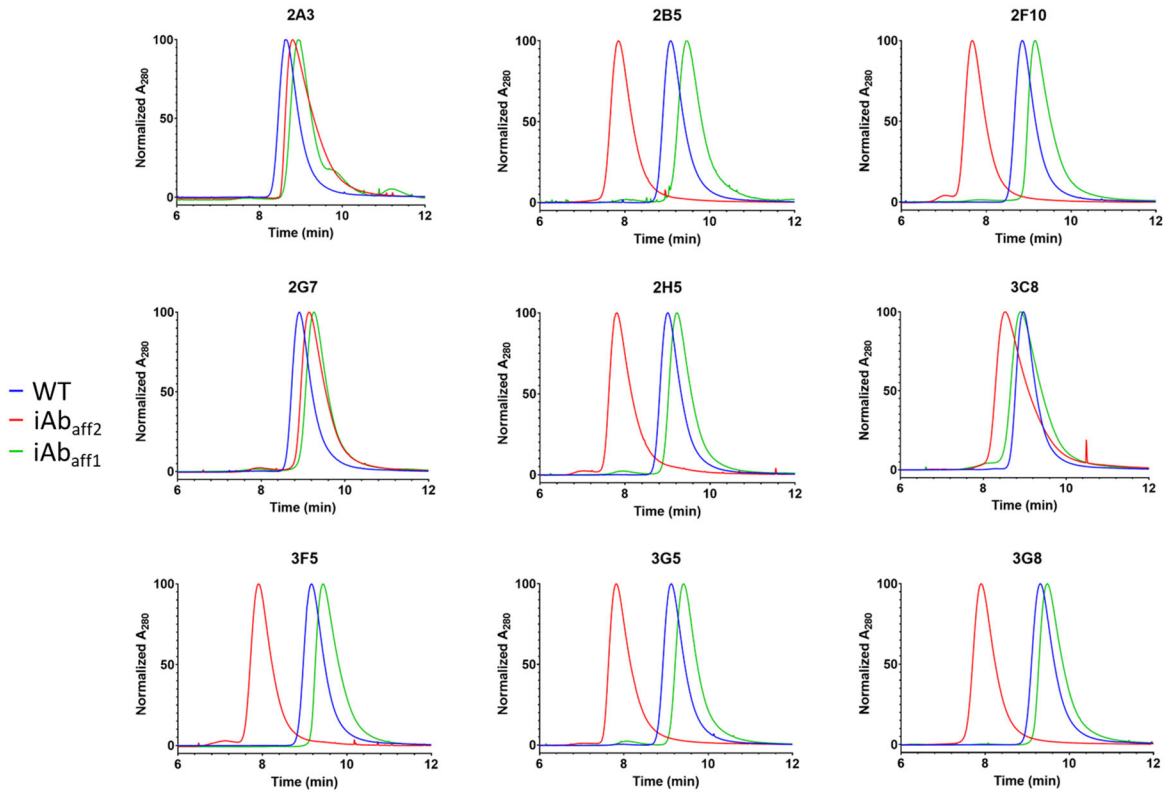

**Supplementary Figure 2.** Analytical size exclusion chromatography analysis of WT and iAb anti-OX40 antibody clones. The  $iAb_{\text{aff1}}$  clones are monomeric similar to WT, with a general trend of a shift toward longer elution times for the iAb. Small differences in elution time can be attributed to either the difference in shape (i- vs Y-shaped antibodies) and/or differences in column interaction from the introduction of additional hydrophobic residues. 7 of the 9  $iAb_{\text{aff2}}$  clones elute at earlier times more consistent with antibody dimers. The dimerization of  $iAb_{\text{aff2}}$  is explored further in Fig. S3.

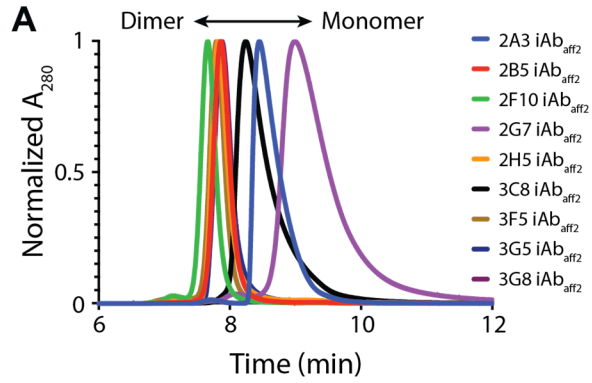

**B**

| Sample                   | SEC-MALS Molecular Weight (Da) | Species |
|--------------------------|--------------------------------|---------|
| 2A3 iAb <sub>aff2</sub>  | 152,200                        | Monomer |
| 2B5 iAb <sub>aff2</sub>  | 284,300                        | Dimer   |
| 2F10 iAb <sub>aff2</sub> | 289,600                        | Dimer   |
| 2G7 iAb <sub>aff2</sub>  | 163,600                        | Monomer |
| 2H5 iAb <sub>aff2</sub>  | 250,500                        | Dimer   |
| 3C8 iAb <sub>aff2</sub>  | 226,800                        | Mixture |
| 3F5 iAb <sub>aff2</sub>  | 264,000                        | Dimer   |
| 3G5 iAb <sub>aff2</sub>  | 277,400                        | Dimer   |
| 3G8 iAb <sub>aff2</sub>  | 291,800                        | Dimer   |

**C**

| Sample                  | Concentration (mg/ml) | SEC-MALS Molecular Weight (Da) |
|-------------------------|-----------------------|--------------------------------|
| 3C8 iAb <sub>aff2</sub> | 4.9                   | 243,600                        |
| 3C8 iAb <sub>aff2</sub> | 1.9                   | 225,200                        |
| 3C8 iAb <sub>aff2</sub> | 0.38                  | 204,100                        |

**Supplementary Figure 3.** Solution behavior of iAb<sub>aff2</sub> anti-OX40 antibody clones. A) Analytical SEC chromatograms of the iAb<sub>aff2</sub> anti-OX40 clones show a range of elution times. B) Table of SEC-MALS data quantitatively characterizes each iAb<sub>aff2</sub> clone as a monomer, dimer, or mixture of the two. C) Concentration dependence of SEC-MALS molecular weight for iAb<sub>aff2</sub> 3C8. As the sample is diluted, the sample becomes more monomeric, demonstrating that the iAb interaction is in equilibrium.

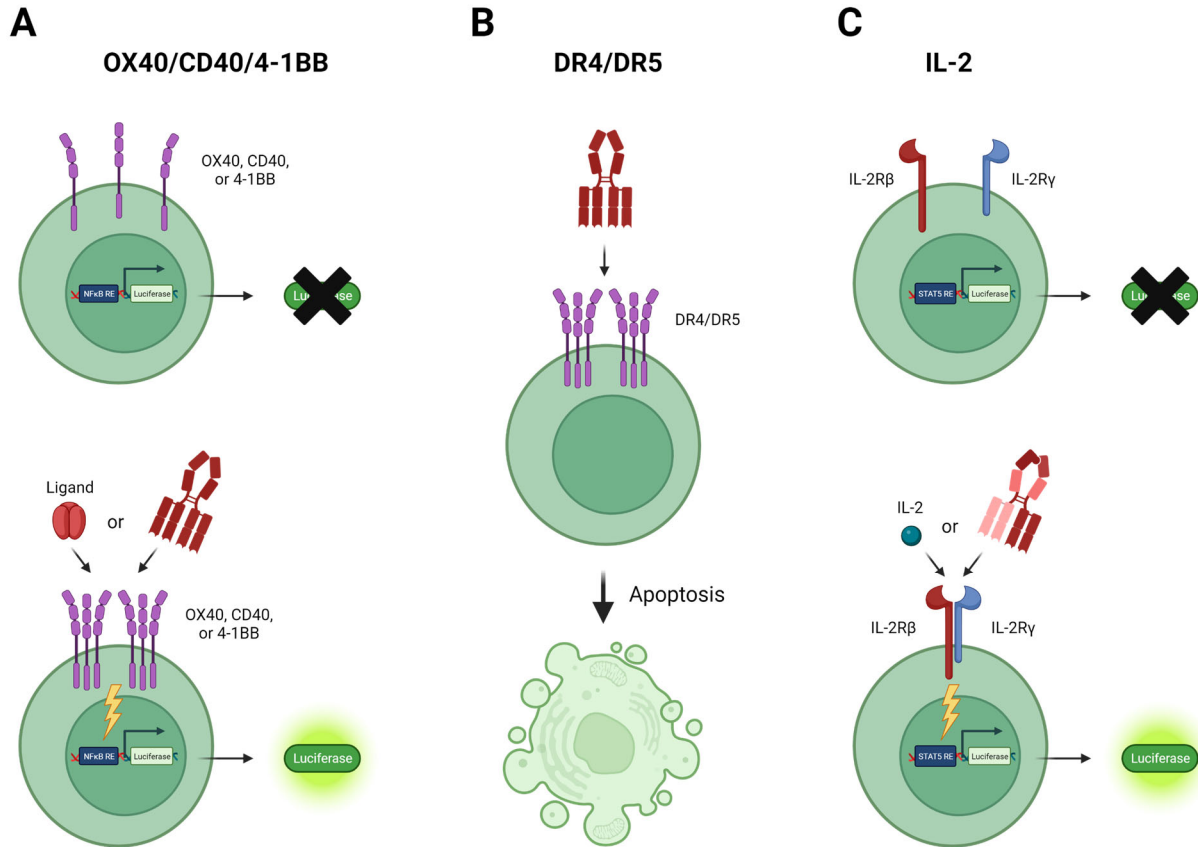

**Supplementary Figure 4.** Schematic depicting cell-based reporter assays. (A) OX40, CD40, and 4-1BB receptor agonism was determined using an NFκB-luciferase reporter cell line engineered to over-express the desired receptor. Agonism of these receptors drives downstream NFκB signaling, which is assessed through the expression of luciferase. (B) DR4 and DR5 receptor agonism was determined using Colo-205 cells that endogenously express both receptors. Agonism of either receptor results in cell death, which was measured using CellTiter-Glo. (C) Agonism of the IL-2 pathway was determined using a Jurkat-based STAT5-luciferase reporter cell line that was engineered to over-express IL-2Rβ and IL-2Rγ. Heterodimerization of IL-2Rβ and IL-2Rγ results in downstream STAT5 signaling, which is assessed through the expression of luciferase. The schematics were created using BioRender.com. See Methods section for more details on each assay.

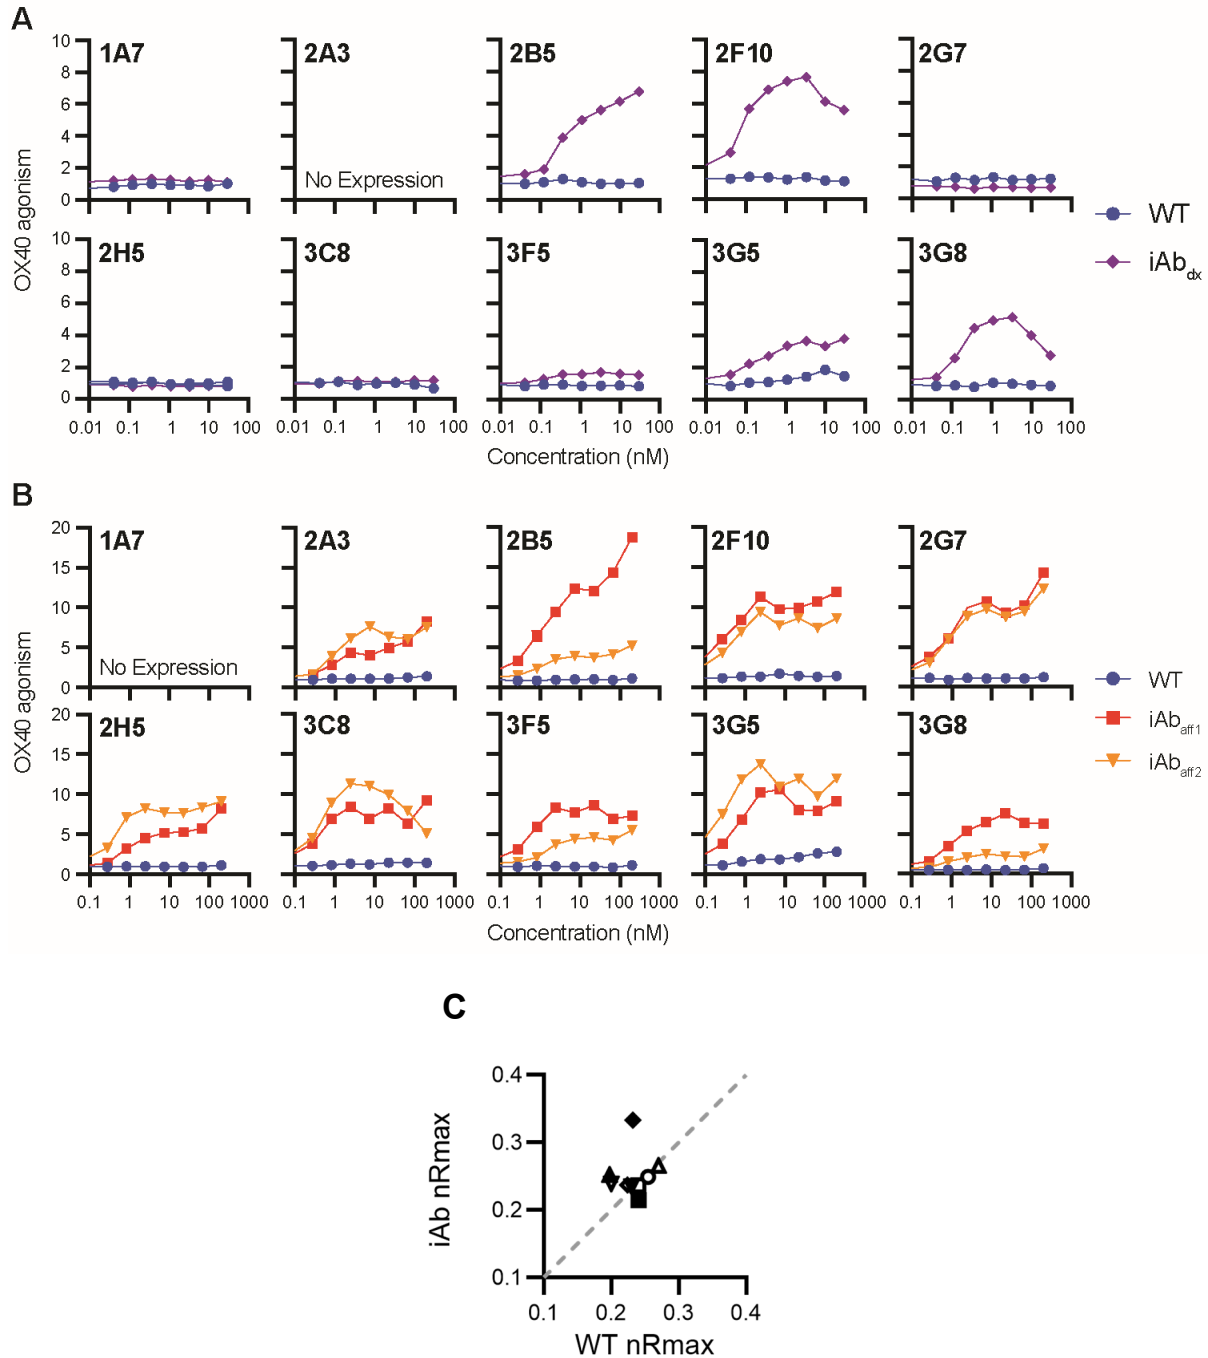

**Supplementary Figure 5.** OX40 agonism activity and binding of iAb inducing mutation sets. A and B) Individual titrations of 10 anti-OX40 clones engrafted with either the iAb<sub>dx</sub> (A) or affinity-based (B) iAb inducing mutation sets. The data are shown as fold change over an untreated control ( $n=2$  independent wells). 2A3 did not express with the iAb<sub>dx</sub> mutation set, while 1A7 did not express with either affinity-based mutation set. C) Surface plasmon resonance (SPR) data comparing normalized Rmax (nRmax) values for each anti-OX40 clone as either an iAb<sub>aff1</sub> or WT IgG. The dotted gray line has a slope of 1 and indicates no change between the two formats. See Figure 2B for the relevant legend for (C). Source data are provided as a Source Data file.

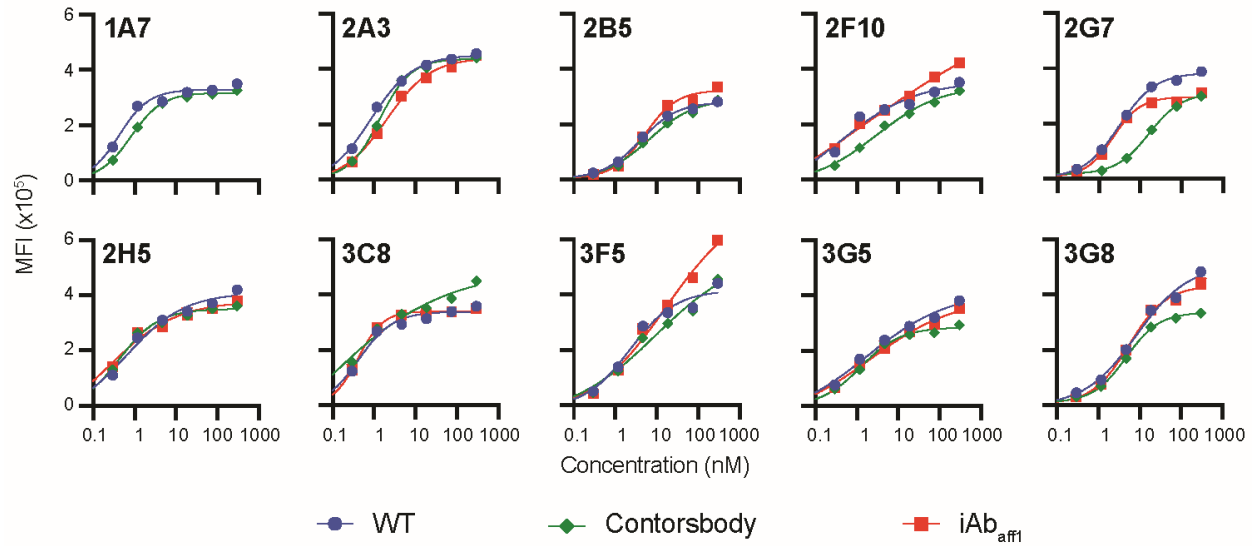

**Supplementary Figure 6.** Anti-OX40 cell binding titrations. Binding of each anti-OX40 clone as WT IgG, contorsbody and iAb<sub>afi</sub> to OX40+ Jurkat cells was detected by FACS with a fluorescently labeled anti-human IgG Fab (n=2 independent wells). Source data are provided as a Source Data file.

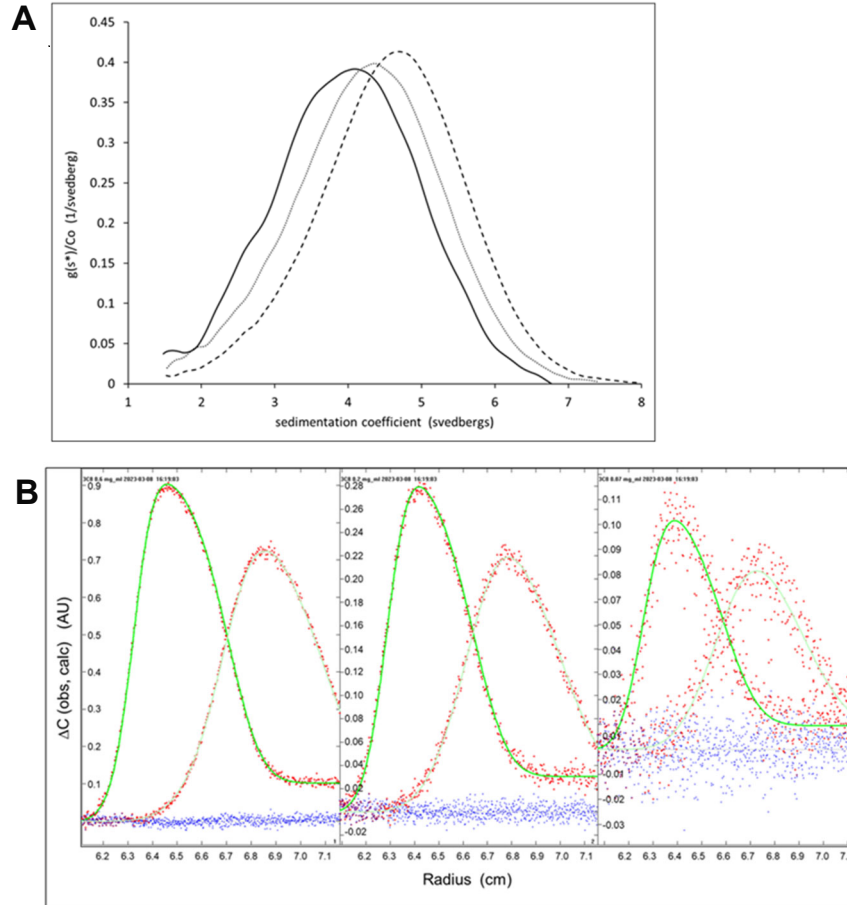

**Supplementary Figure 7.** Solution conformation of 3C8 iAb<sub>affected</sub> Fab determined by analytical ultracentrifugation. (A)  $g(s^*)$  distributions of 0.6 mg/ml (dashed trace), 0.2 mg/ml (dotted trace) and 0.07 mg/ml (solid trace) 3C8 iAb<sub>affected</sub> Fab over the same reduced sedimentation time for each concentration, normalized for loading concentration. (B) Global fit to a monomer – dimer equilibrium from the same three protein concentrations as in (A). Shown for each concentration are the first and last ordered sets out of the 42 sets used in the fit. The red points are concentration differences,  $\Delta C(obs)$ , at constant radius between two absorbance scans taken at different times. The solid green lines are concentration differences,  $\Delta C(calc)$ , calculated from the parameters being fit. The  $\Delta C(obs)$  and  $\Delta C(calc)$  correspond to the left y-axis in units of absorbance at 280 nm. The plotted deviations between the observed and calculated concentration differences (blue points) are on the right y-axis using the same units and scale but offset to be at the bottom of each plot. The x-axis, radius of the cell in cm, is the same for both y-axes.



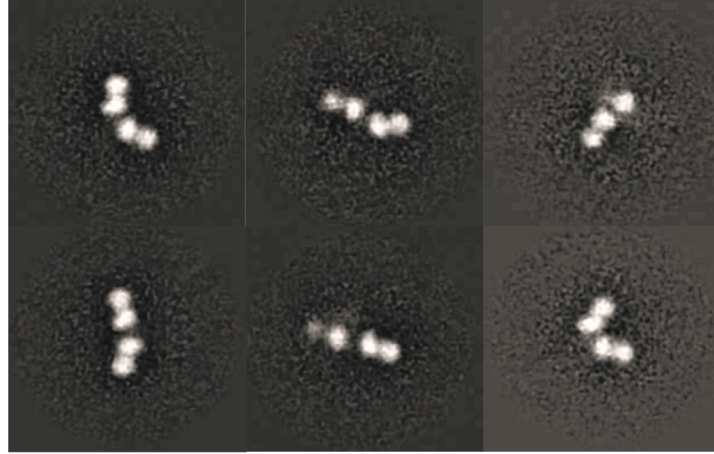

**Supplementary Figure 8.** Negative stain electron microscopy 2D classification images of the anti-OX40 antibody 3C8 with the  $iAb_{aff1}$  residue set in the  $F(ab')_2$  format. While the full-length IgG format of 3C8  $iAb_{aff1}$  adopts the i-shaped conformation (Fig. 2A), none of the 2D classes of the  $F(ab')_2$  show intramolecular Fab-Fab association. The representative images shown are from a single experiment and data collection.

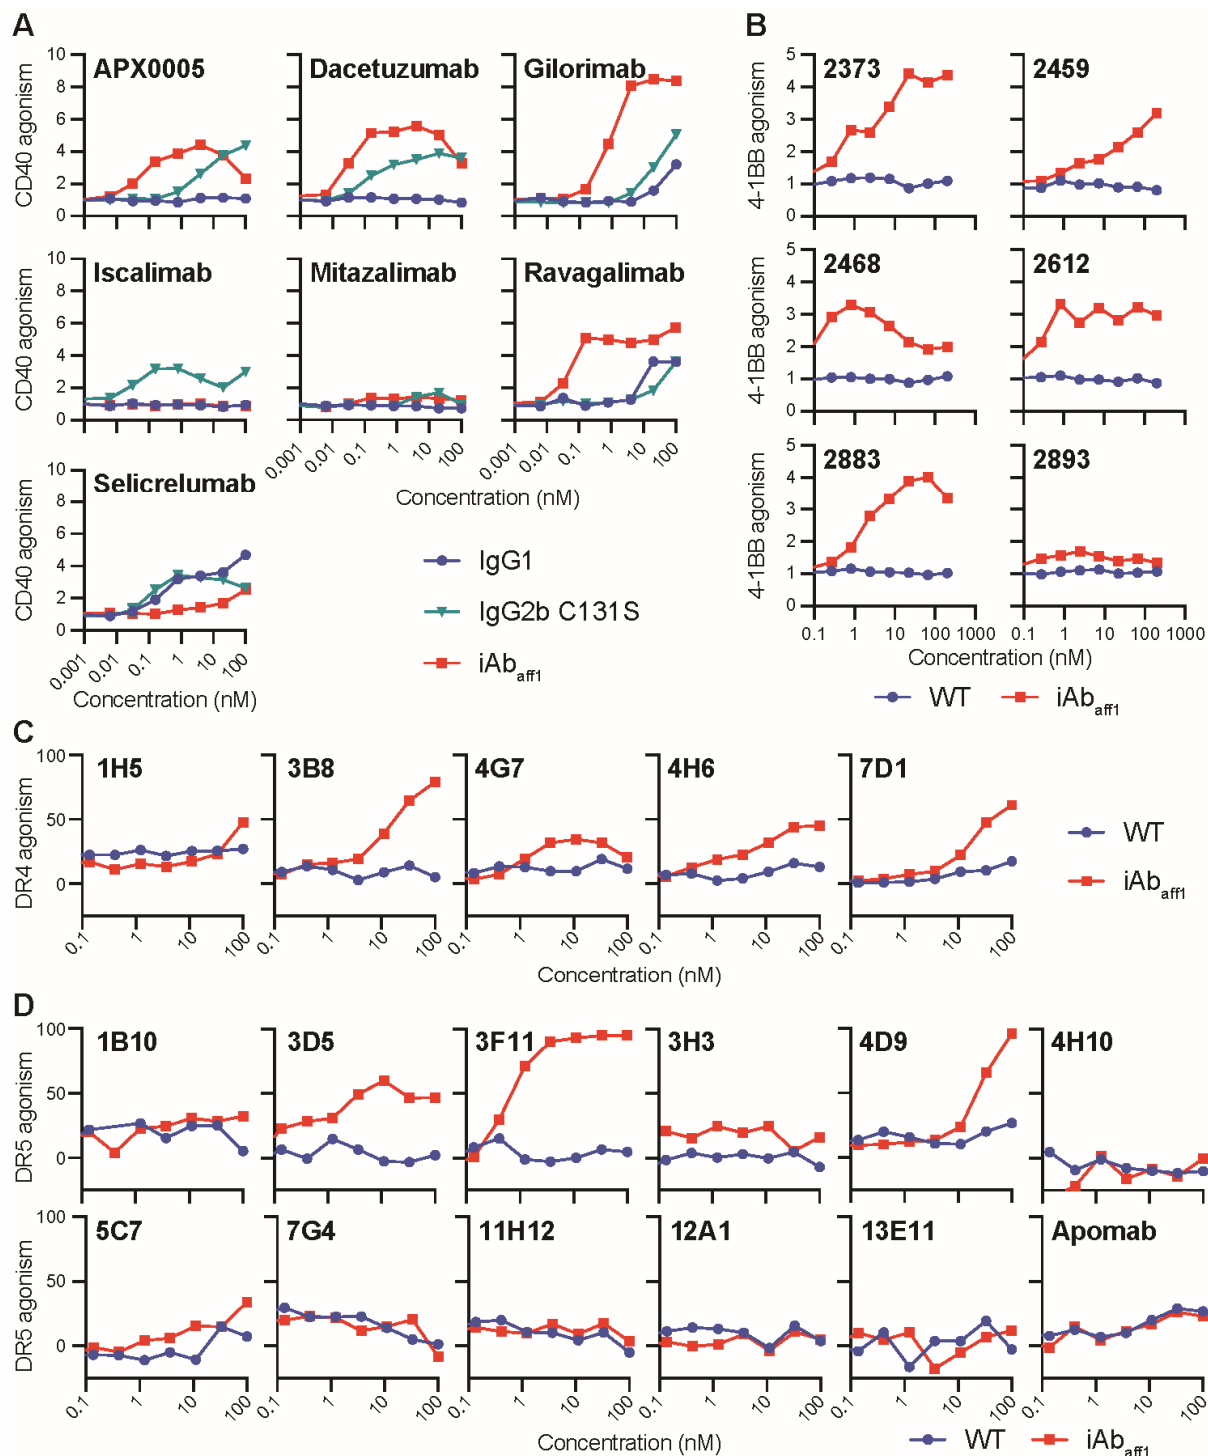

**Supplementary Figure 9.** iAb-induced agonism across 4 TNFRSF members. Individual activity titrations are shown of various formats for antibody clones against CD40 (A), 4-1BB (B), DR4 (C), and DR5 (D). CD40 and 4-1BB agonism are shown as fold change over an untreated control, while DR4 and DR5 agonism are shown as % killing relative to an untreated control (n=2 independent wells). Each anti-CD40 clone was produced as a WT human IgG1, human IgG2 C131S, and iAb<sub>aff1</sub>, while all clones against other targets were only produced as a WT IgG1 and iAb<sub>aff1</sub>. Source data are provided as a Source Data file.

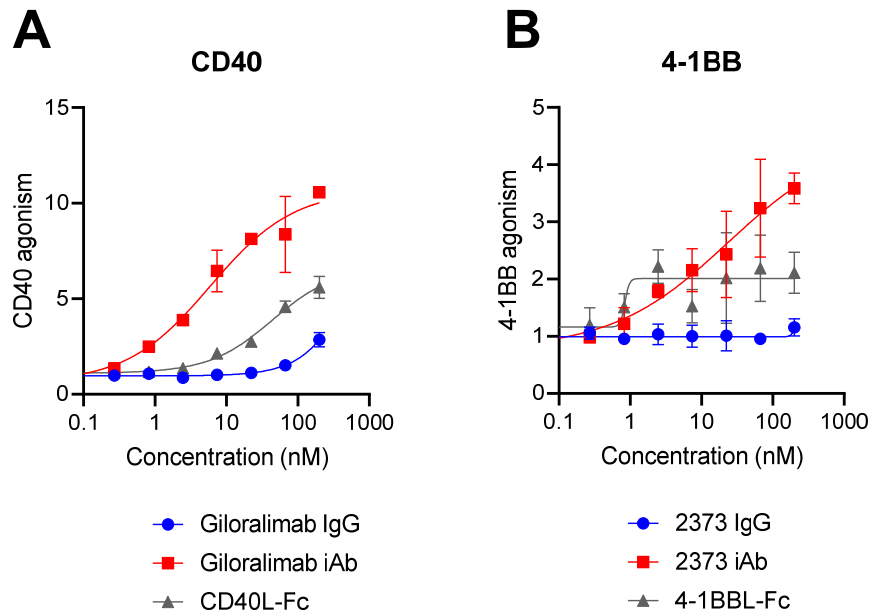

**Supplementary Figure 10.** Agonist activity of additional native TNFRSF ligands versus iAb<sub>aff1</sub> format. Comparison of agonist activity for the native ligands CD40 (A) or 4-1BB (B) with WT IgG or iAb<sub>aff1</sub> formats of an antibody clone for each TNFRSF member. The data are shown as fold change over an untreated control (n=3 independent wells) and presented as mean values +/- SEM. Source data are provided as a Source Data file.



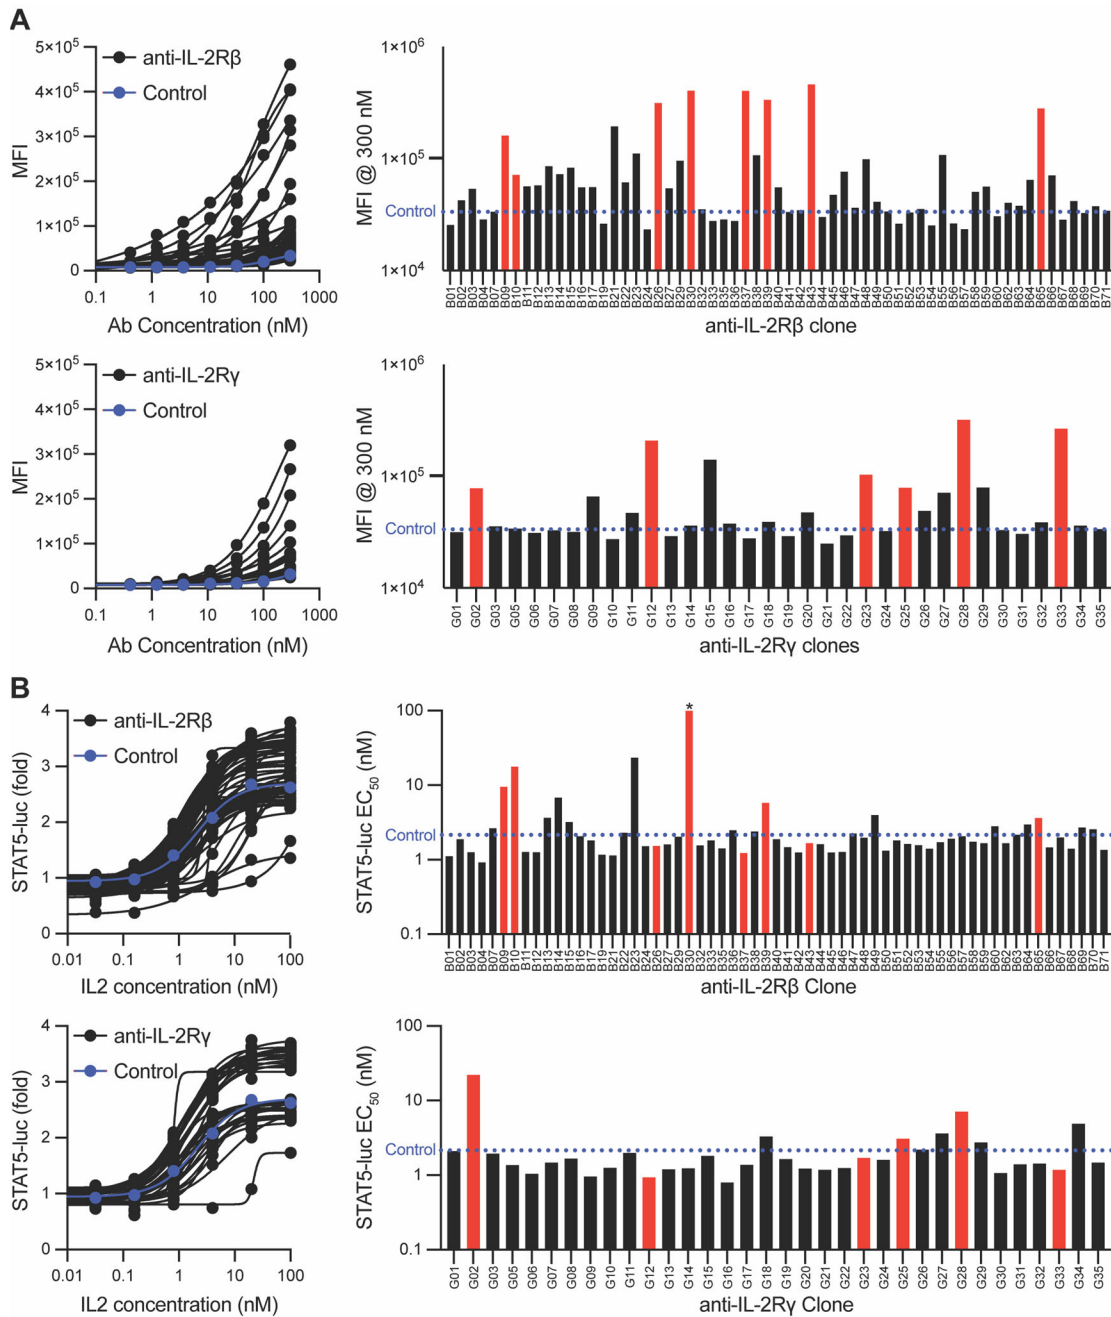

**Supplementary Figure 12.** Characterization of anti-IL-2R $\beta$  and anti-IL-2R $\gamma$  antibody clones discovered by yeast display. Cell binding (A) and IL-2 blocking (B) analysis using Jurkat <sup>$\beta\gamma$</sup> -STAT5-Luc cells for anti-IL-2R $\beta$  (top) and anti-IL-2R $\gamma$  (bottom) clones discovered by yeast display (n=1 sample per antibody). For IL-2 blocking experiments, cells were first coated with 1  $\mu$ M of each monospecific anti-IL-2R $\beta$  or anti-IL-2R $\gamma$  clone for 1 hour prior to the addition of an IL-2 serial dilution. For each analysis the anti-HER2 antibody, trastuzumab, was used as a negative control and shown in blue. The bar graphs on the right of each dose titration present the MFI at 300 nM and IL-2 EC<sub>50</sub> of each antibody clone. Lead clones selected for bispecific reformatting are shown in red. The asterisk in the bottom graph denotes an EC<sub>50</sub> greater than 100 nM. Source data are provided as a Source Data file.

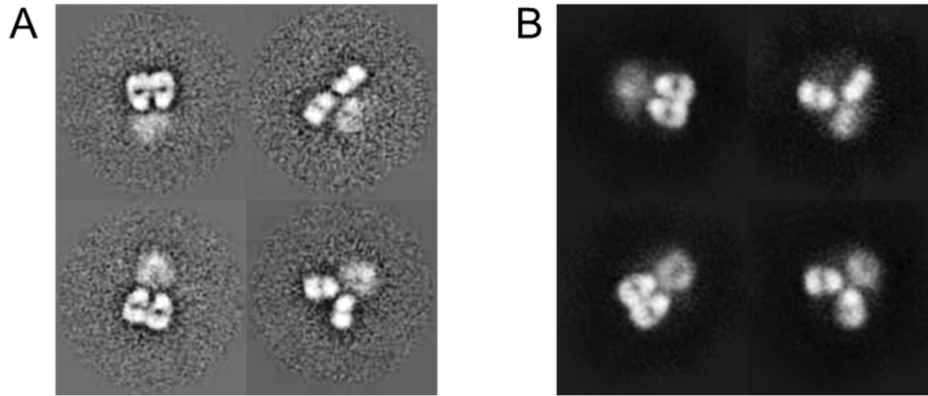

**Supplementary Figure 13.** Analysis of i-shaped antibody formation for two representative bispecific anti-IL-2R antibodies. Negative stain electron microscopy 2D classification images of the B10/G28 (A) and the B09/G28 (B) bispecific antibodies with the  $iAb_{aff1}$  residue set. The former demonstrated IL-2 agonist activity, while the latter did not (Fig. 5A). For the B10/G28 and B09/G28  $iAb_{aff1}$  bispecific antibodies, 39% and 59% of the particles, respectively, adopt the i-shaped conformation, while the remaining particles are Y-shaped. The representative images shown are from a single sample preparation and data collection per antibody.

**Supplementary Table 1.** Parameters calculated from monomer – dimer equilibrium fit to AUC data

| <b>Parameter</b>                  | <b>Value</b> |
|-----------------------------------|--------------|
| Monomer molecular weight          | 47.2 kDa     |
| Monomer sedimentation coefficient | 3.5 s        |
| Dimer sedimentation coefficient   | 4.9 s        |
| Equilibrium dissociation constant | 6.8 $\mu$ M  |
| Standard deviation of the fit     | 0.011 AU     |

**Supplementary Table 2.** Surface plasmon resonance analysis of anti-IL-2R $\beta$  and anti-IL-2R $\gamma$  clones

| Clone | KD (nM) | Rmax  | Clone | KD(nM) | Rmax | Clone | KD (nM) | Rmax |
|-------|---------|-------|-------|--------|------|-------|---------|------|
| B01   | NB      | NB    | B44   | NB     | NB   | G01   | NB      | NB   |
| B02   | 31.044  | 39.7  | B45   | NB     | NB   | G02   | 9.595   | 71.5 |
| B03   | 53.915  | 11.8  | B46   | NB     | NB   | G03   | 37.585  | 38   |
| B04   | NB      | NB    | B47   | NB     | NB   | G05   | NB      | NB   |
| B07   | NB      | NB    | B48   | 26.434 | 11.1 | G06   | NB      | NB   |
| B09   | 10.515  | 37    | B49   | 17.921 | 54.8 | G07   | NB      | NB   |
| B10   | 2.866   | 106.1 | B50   | NB     | NB   | G08   | 32.351  | 17.4 |
| B11   | NB      | NB    | B51   | NB     | NB   | G09   | NB      | NB   |
| B12   | NB      | NB    | B52   | NB     | NB   | G10   | NB      | NB   |
| B13   | 5.939   | 93.8  | B53   | NB     | NB   | G11   | 14.053  | 4.8  |
| B14   | 5.479   | 78.8  | B54   | NB     | NB   | G12   | 52.694  | 2.3  |
| B15   | 26.812  | 50.1  | B55   | 26.768 | 12.5 | G13   | NB      | NB   |
| B16   | 20.245  | 67.6  | B56   | NB     | NB   | G14   | 48.288  | 12.8 |
| B17   | 18.455  | 38.3  | B57   | NB     | NB   | G15   | NB      | NB   |
| B19   | NB      | NB    | B58   | NB     | NB   | G16   | NB      | NB   |
| B21   | NB      | NB    | B59   | 8.762  | 34   | G17   | 36.651  | 20.8 |
| B22   | 22.983  | 63.1  | B60   | NB     | NB   | G18   | 128.12  | 5.8  |
| B23   | NB      | NB    | B62   | NB     | NB   | G19   | 25.488  | 9.5  |
| B24   | NB      | NB    | B63   | NB     | NB   | G20   | NB      | NB   |
| B26   | 6.538   | 68    | B64   | 39.233 | 10.7 | G21   | 36.436  | 7.7  |
| B27   | 23.019  | 63.1  | B65   | 45.233 | 11.7 | G22   | NB      | NB   |
| B29   | 20.953  | 14.6  | B66   | NB     | NB   | G23   | 41.21   | 33.2 |
| B30   | 13.977  | 41.5  | B67   | NB     | NB   | G24   | NB      | NB   |
| B32   | 26.008  | 56.3  | B68   | NB     | NB   | G25   | 47.436  | 13.4 |
| B33   | 73.597  | 7.4   | B69   | 33.321 | 46.3 | G26   | 6.935   | 10.9 |
| B35   | NB      | NB    | B70   | NB     | NB   | G27   | 18.451  | 6.6  |
| B36   | NB      | NB    | B71   | 63.981 | 11.9 | G28   | 68.679  | 14.1 |
| B37   | 36.143  | 7.2   |       |        |      | G29   | 39.414  | 6.3  |
| B38   | NB      | NB    |       |        |      | G30   | NB      | NB   |
| B39   | 3.995   | 70.7  |       |        |      | G31   | NB      | NB   |
| B40   | NB      | NB    |       |        |      | G32   | NB      | NB   |
| B41   | NB      | NB    |       |        |      | G33   | 19.852  | 16.5 |
| B42   | NB      | NB    |       |        |      | G34   | 131.23  | 63.2 |
| B43   | 13.255  | 41.6  |       |        |      | G35   | 37.234  | 4.7  |
